# 1 Genome sequencing reveals the impact of non-canonical exon inclusions 2 in rare genetic disease

3

4 Georgia Pitsava<sup>1</sup>, Megan Hawley<sup>2</sup>, Light Auriga<sup>1</sup>, Ivan de Dios<sup>1</sup>, Arthur Ko<sup>3</sup>, Sofia Marmolejos<sup>3</sup>, Miguel  
5 Almalvez<sup>1</sup>, Ingrid Chen<sup>2</sup>, Kaylee Scozzaro<sup>2</sup>, Jianhua Zhao<sup>2</sup>, Rebekah Barrick<sup>6</sup>, Nicholas Ah Mew<sup>3,4</sup>,  
6 Vincent A. Fusaro<sup>1</sup>, Jonathan LoTempio<sup>1</sup>, Matthew Taylor<sup>7</sup>, Luisa Mestroni<sup>7</sup>, Sharon Graw<sup>7</sup>, Dianna  
7 Milewicz<sup>8</sup>, Dongchuan Guo<sup>8</sup>, David R. Murdock<sup>8</sup>, Kinga M. Bujakowska<sup>9</sup>, UCI-GREGoR Consortium,  
8 Changrui Xiao<sup>5</sup>, Emmanuèle C. Délot<sup>1</sup>, Seth I. Berger<sup>3,4</sup>, Eric Vilain<sup>1</sup>

9

10

11 <sup>1</sup>Institute for Clinical and Translational Science, University of California, Irvine, CA, USA

12 <sup>2</sup>Labcorp Genetics Inc, Burlington, North Carolina, USA

13 <sup>3</sup>Center for Genetic Medicine Research, Children's National Research Institute, Washington, DC, USA

14 <sup>4</sup>Division of Genetics and Metabolism, Children's National Hospital, Washington, DC, USA

15 <sup>5</sup>Department of Neurology, University of California, Irvine, CA, USA

16 <sup>6</sup>Division of Metabolic Disorders, Children's Hospital of Orange County (CHOC), Orange, CA 92868,  
17 USA

18 <sup>7</sup>Cardiovascular Institute and Adult Medical Genetics Program, University of Colorado Anschutz Medical  
19 Campus, Aurora, CO, USA

20 <sup>8</sup>Division of Medical Genetics, University of Texas Health Science Center at Houston (UTHealth)  
21 McGovern Medical School, Houston, Texas, USA

22 <sup>9</sup>Ocular Genomics Institute, Department of Ophthalmology, Massachusetts Eye and Ear Infirmary,  
23 Harvard Medical School, Boston, MA, USA

24

25

26 Correspondence: [sberger@childrensnational.org](mailto:sberger@childrensnational.org)

27

28

29

30

31

32

33 Abstract

34

35 Introduction

36 Advancements in sequencing technologies have significantly improved clinical genetic testing,  
37 yet the diagnostic yield remains around 30-40%. Emerging sequencing technologies are now  
38 being deployed in the clinical setting to address the remaining diagnostic gap.

39 Methods

40 We tested whether short-read genome sequencing could increase diagnostic yield in individuals  
41 enrolled into the UCI-GREGoR research study, who had suspected Mendelian conditions and  
42 prior inconclusive clinical genetic testing. Two other collaborative research cohorts, focused on  
43 aortopathy and dilated cardiomyopathy, consisted of individuals who were undiagnosed but had  
44 not undergone harmonized prior testing.

45 Results

46 We sequenced 353 families (754 participants) and found a molecular diagnosis in 54 (15.3%) of  
47 them. Of these diagnoses, 55.5% were previously missed because the causative variants were in  
48 regions not interrogated by the original testing. In 9 cases, they were deep intronic variants, 5 of  
49 which led to abnormal splicing and cryptic exon inclusion, as directly shown by RNA  
50 sequencing. All 5 of these variants had inconclusive spliceAI scores. In 26% of newly diagnosed  
51 cases, the causal variant could have been detected by exome sequencing reanalysis.

52 Conclusion

53 Genome sequencing overcomes multiple limitations of clinical genetic testing, such as inability  
54 to call intronic variants and technical limitations. Our findings highlight cryptic exon inclusion as  
55 a common mechanism via which deep intronic variants cause Mendelian disease. However, they  
56 also reinforce that reanalysis of exome datasets can be a fruitful approach.

57

58

59

60

61

62 Keywords: genome sequencing, RNA sequencing, rare disease, intronic variants, cryptic exon

63

64

65

## 66 **Introduction**

67 The widespread application of clinical genetic testing has tremendously increased the rate at which  
68 rare genetic diseases are being diagnosed and new gene-disease associations are identified. Despite  
69 this progress, the diagnostic yield of clinical genetic testing remains 30-40% [1, 2]. There are  
70 several reasons for this plateau. For many conditions, the causal genes are still unidentified. Even  
71 for conditions with known causal genes, interpreting the clinical significance of variants can be  
72 challenging. This is because there are a large number of variants with insufficient information  
73 pertinent to their pathogenicity, known as variants of unknown significance (VUS). In addition,  
74 technical limitations of commonly offered clinical tests can result in missed variants, for example  
75 in regions that are not represented in exome sequencing such as deep intronic and untranslated  
76 regions. Epigenetic factors that affect gene expression but are not interrogated by standard testing  
77 potentially add to the complexity.

78 Molecular sequencing technologies not traditionally used in the clinical setting are now being  
79 deployed in order to overcome these challenges. These include the increasing use of genome  
80 sequencing (GS) as well as RNA sequencing. The latter can be especially useful for directly  
81 evaluating the functional consequences of intronic variants and variants in splice regions, since  
82 despite advances in computational predictors of splicing disruption (such as SpliceAI and Pangolin  
83 [3, 4]) it often remains difficult to determine if these variants are pathogenic or not.

84 The University of California, Irvine (UCI) - GREGoR site, part of the GREGoR (Genomics  
85 Research to Elucidate the Genetics of Rare Diseases) Consortium, has been evaluating the  
86 diagnostic utility of these newer approaches. Our study has been enrolling participants whose  
87 clinical presentation strongly suggests a genetic cause, but who remain without a molecular  
88 diagnosis, despite having undergone conventional genetic testing (gene panels, chromosomal  
89 microarray, exome sequencing - ES).

90 Here, we describe our center's experience from short-read GS of a cohort of 353 such families  
91 (754 participants). To help disambiguate previously or newly detected variants (VUS or single  
92 heterozygous pathogenic variants in recessive disease genes), we deployed additional methods,  
93 including RNA sequencing. We also provide an overview of our cohort and focus on lessons  
94 learned from informative, successfully solved cases.

95

## 96 **Methods**

### 97 *Participants*

98 The Mendelian Genomics Research Center was launched in 2021, between Children's National  
99 Hospital, Invitae, and more recently UCI. The study was approved by the Institutional Review  
100 Board (IRB) of Children's National Hospital (Pro00015852). Study participants included  
101 probands with a suspected Mendelian condition and prior non-diagnostic clinical testing, such as  
102 gene panels, chromosomal microarray, or ES. Testing on additional family members was  
103 performed when available. Individuals were enrolled over a three-year period, from July 2021 to  
104 April 2024, through referrals by physicians and collaborators, or self-referral via our website

105 (<https://research.childrensnational.org/labs/pediatric-mendelian-genomics-research-center>).  
106 Written informed consent was available in both English and Spanish and was obtained for all  
107 families by study staff or through a study-specific automated chatbot [5]. Workflows for remote  
108 enrollment and sample collection were established, eliminating the need for participants to travel.  
109 Following consent, buccal swabs and/or peripheral blood samples were collected from probands  
110 and their relevant available family members. Some participants provided clinically generated  
111 genome data for reanalysis [6]. In addition, our study population involved two collaborative  
112 cohorts, one focusing on aortopathy and another on dilated cardiomyopathy; for these their prior  
113 genetic testing may not have been as comprehensive or well documented. Phenotypic categories  
114 are described in **Table 1**.

### 115 *Short-read Genome Sequencing*

116 Blood and buccal samples were sent to Invitae® laboratories where they were processed and  
117 underwent genome sequencing using Illumina NovaSeq 6000. Sequencing files were subsequently  
118 aligned to the hg38 human genome assembly with bwa-mem using soft clipping enabled for  
119 supplementary alignments (-Y), processed at 120,000,000 input bases per batch for reproducibility  
120 (-K) [7] and genotyped using Google DeepVariant [8]. Structural variant calling was performed  
121 with Illumina Manta [9]. Alignments and variant call files are available on the NHGRI Analysis  
122 Visualization and Informatics Lab-space (AnVIL; [AnVIL Portal](#)) on the GREGoR Consortium  
123 workspace.

### 124 *Short-read RNA sequencing*

125 Blood samples were preserved in PAXgene tubes processed with the WatchMaker Genomics RNA  
126 library prep kit with the Polaris depletion module to create stranded and ribosomal/globin-depleted  
127 libraries. They then underwent RNA sequencing using the Illumina NovaSeq 6000 S4 flowcells  
128 generating 100-200 million 150-bp read pairs. Reads were aligned to hg38 using STAR (v2.7.10a)  
129 [10] with the GENCODEv41 annotation. We employed the basic two-pass mode and allowed up  
130 to 3 mismatches and a minimum aligned length of 100 bp. Alignments were visualized using  
131 integrative genomics viewer (IGV) [11-14]. Alignments are available on AnVIL ([AnVIL Portal](#)).

### 132 *Mini gene assays*

133 A minigene splicing assay was performed using a mini-gene split Green Fluorescent Protein (GFP)  
134 construct [15], in which N- and C-terminal parts of the *GFP* gene were separated by *SMN1* introns  
135 7 and 8 (NM\_000344). Reference and mutated gene fragments containing 1000 bp of *DBT* intron  
136 10 surrounding the c.1282-4218G>A variant flanked with 30 bp vector homology arms were  
137 synthesized (TWIST Bioscience, USA) and cloned into the mini-gene construct (Gibson Assembly  
138 Master Mix, New England Biolabs). After Sanger sequencing verification of all constructs, they  
139 were transfected into HEK293 cells (Lipofectamine 3000, Thermo Fisher Scientific). Forty-eight  
140 hours post transfection, total RNA was extracted from the transfected cells (RNAeasy Mini Kit,  
141 Qiagen) and cDNA was generated using random hexamer primers (SuperScript IV Synthesis Kit,  
142 Thermo Fisher Scientific). Subsequently, the minigene transcripts were amplified from the cDNA  
143 using primers specific to the split *GFP* fragments (F: 5'-  
144 CACACTGGTGACAACATTTACATAC-3'; R: 5'-GAAATCGTGCTGTTTCATGTGATC-3').

145 The PCR products were column-purified (DNA Clean & Concentrator-5, Zymo Research) and  
146 analyzed with next-generation amplicon sequencing (MiSeq, Illumina, OGI Genomics Core). The  
147 splicing pattern analysis was performed by aligning the sequence reads to the hybrid reference of  
148 the split *GFP* construct containing the *DBT* intron 10 (STAR Aligner) [16] and visualizing the  
149 reads in (IGV) [11-14]. The same process was followed to test the effect of the *HFE* VUS found  
150 in participant PMGRC-124-124-0.

#### 151 *Variant prioritization and analysis*

152 Phenotypic data for probands was collected via a manual review of electronic medical records or  
153 provided by collaborating researchers. The phenotypes of each proband were converted to Human  
154 Phenotype Ontology (HPO) terms.

155 Variants were reviewed by expert curators using the MOON™ software. MOON implements a  
156 natural language processing approach to prioritize variants in genes that are likely to be related to  
157 an individual's phenotype based on published literature [17, 18]. Cases were reviewed with the  
158 goal of identifying pathogenic, likely pathogenic, and VUS in known disease genes consistent with  
159 the phenotype of the proband. In addition to sequence and structural variants prioritized by  
160 MOON, rare sequence variants in the following categories were reviewed: those expected to result  
161 in loss of function, *de novo* variants, compound heterozygous or homozygous variants,  
162 hemizygous variants, variants classified as likely pathogenic or pathogenic in ClinVar, and  
163 variants in genes associated with conditions with a high clinical overlap for the patient.

164 Cases were considered “solved” when a disease-causing variant or multiple disease-causing  
165 variants in a gene associated with a condition consistent with the phenotype of the proband were  
166 detected. The number and phase of variants needed to be consistent with the inheritance pattern of  
167 the condition. For example, a single likely pathogenic or pathogenic variant in an autosomal  
168 dominant condition or biallelic likely pathogenic or pathogenic variants in an autosomal recessive  
169 condition were needed for a case to be considered “solved”. Cases were considered “probably  
170 solved” when one or more of the variants were classified as a VUS but there was a strong  
171 phenotypic overlap with the clinical presentation of the patient. Cases were considered “partially  
172 solved” if likely pathogenic or pathogenic variants consistent with the inheritance pattern of the  
173 condition were detected, but the result only explained part of the proband's phenotype.

174 Finally, we note that analysis is ongoing; the data reported on this manuscript are as of October 1,  
175 2024.

176

## 177 **Results**

### 178 *Genome Sequencing leads to a molecular diagnosis in 15.3% of previously unsolved cases*

179 A total of 353 families underwent GS during the designated period; demographic information is  
180 shown in **Figures 1a and 1b**. Our study included several different family structures; 41.9%  
181 (n=148) were proband-only cases, 13.3% (n=47) were duos or duos plus another family member  
182 (duo+), 43.3% (n =153) were trios or trios with another family member (trio+) and 1.4% (n=5)

183 consisted of other family combinations (**Figure 2a**). This accounts for a total of 754 genomes  
184 analyzed.

185 A genetic diagnosis was found in 54 (15.3%) cases (solved/probably solved; Supplemental Table  
186 1). As expected, the diagnostic yield was higher in trios/trios+ compared to duos/duos + and  
187 proband-only families (21% vs 13% and 10%; **Figure 2b**). This difference was statistically  
188 significant ( $p = 0.03$ , chi-square test).

189 In addition, 6 cases (1.7%) were partially solved; that is, the identified variant could explain part,  
190 but not the entirety, of the individual's phenotype. Furthermore, we found a candidate variant in  
191 approximately 9% of the cases that remained unsolved (27 out of the 299; Supplemental Table 2).

192 To better understand why the diagnosis was previously missed in the 54 solved/probably solved  
193 cases, we examined the type of prior testing these participants had undergone (**Figure 3a**). In 26%  
194 (14 out of 54) of solved cases, the causal variant had been identified by initial testing but was not  
195 reported either because the gene-phenotype association was unknown at the time of that testing or  
196 because the variant was not classified as pathogenic at the time (**Figure 3b**). Below, we focus on  
197 cases where initial testing did not interrogate the genomic region harboring the causative variant.

198 *Diagnoses in uninterrogated regions of original testing highlight cryptic exon inclusion as a*  
199 *common mechanism by which deep intronic variants cause disease*

200 In the majority of solved/probably solved cases (55.5%; 30 out of 54 cases), the diagnosis was  
201 missed before because the original testing method was unable to call variants in the region  
202 harboring the causative variant. For example, there were 13 cases where panel testing did not  
203 include the causal gene, and 13 cases where the causative variant was non-coding. In one case, a  
204 synonymous coding-region variant was predicted by spliceAI to lead to intron retention in *HFE*.  
205 This intron retention event leading to a stop-gain was confirmed using a mini gene assay  
206 (Supplemental Figure 1).

207 With respect to non-coding causative variants, these were deep intronic in 9 cases. In five of those,  
208 the causative variant altered the canonical splicing pattern via the inclusion of a cryptic exon  
209 (**Table 2**). Variant pathogenicity was revealed by RNAseq, which directly demonstrated the effect  
210 at the transcript level. For example, one case was due to an intronic variant in *PEXI*, in a patient  
211 with a known biochemical diagnosis of Zellweger Spectrum Disorder and a carrier of a  
212 heterozygous known pathogenic variant in *PEXI*. The abnormal cryptic exon inclusion was  
213 revealed by RNAseq (Supplemental Figure 2). Another example was a newborn female who was  
214 biochemically diagnosed with thiamine-responsive maple syrup urine disease (MSUD) based on  
215 the same diagnosis in her sister. However, all prior genetic testing (panel testing of 9 genes, *ASL*  
216 single-gene testing, and ES) was negative. GS revealed a homozygous deep (-4230) intronic single  
217 nucleotide variant predicted to lead to aberrant splicing of *DBT*, a gene known to cause MSUD  
218 type II (OMIM# 620699), which can sometimes be thiamine-responsive. RNAseq confirmed the  
219 cryptic exon inclusion, establishing the molecular diagnosis (**Figure 4a**). This variant was also  
220 confirmed by minigene assay (**Figure 4b-e**). In another case we found a deep intronic variant in a  
221 case of Coffin-Siris, which we validated by epismature in long-read sequencing [19].

222 We found that, in all five cases with a cryptic exon inclusion, both the acceptor gain and the donor  
223 gain spliceAI scores fell within a range generally considered inconclusive with regards to impact  
224 on splicing (range 0.16 - 0.43 for acceptor gain scores; 0.19 - 0.55 for donor gain scores). This  
225 observation, while preliminary, suggests that the combination of such acceptor gain and donor gain  
226 scores may be a marker for variants leading to this splicing alteration. Of note, commonly used  
227 pre-calculated spliceAI scores limit their search to 50 bp from the variant, and therefore in each of  
228 these examples the new splice acceptor would not have been detected with pre-calculated spliceAI  
229 scores alone. It required a direct calculation of a spliceAI score with a search of at least 500 bp  
230 from the variant. Pangolin scores were generally higher than spliceAI scores.

231 Four additional cases harbored variants in the spliceosomal non-coding RNA *RNU4-2* and  
232 contributed to the discovery of ReNU syndrome (OMIM#620851) [20]. Variants in this gene  
233 represent a new, surprisingly common etiology of neurodevelopmental disorders, explaining  
234 approximately 0.4% of such cases.

235 Finally, an informative example in which the causal variant was missed due to variant filtering  
236 parameters driven by limitations of ES was a woman in her 30s with glomuvenous malformations,  
237 conductive hearing loss, and midline malformations. Previous testing included a cancer 38-gene  
238 panel, *GLA* single-gene testing, ES, and mitochondrial testing; all were negative. GS revealed a  
239 known pathogenic exonic frameshift variant in *GLMN* (Glomuvenous Malformation Syndrome;  
240 OMIM#138000). Upon review of the previous clinical ES, we discovered that this same variant  
241 was detectable in the original data. However, the variant had not been reported as the exon was  
242 excluded from the lab's clinically validated regions due to a propensity for sequencing artifacts in  
243 this exon. Clinicians ordering clinical exome sequencing may not be aware of the coverage  
244 limitations of clinically relevant genes or exons important for the testing indication.

#### 245 *Detection of structural variants*

246 We also identified structural variants not detected by previous testing. This includes a complex  
247 rearrangement of *OCA2* with deep intronic breakpoints [6] and deletion of the first exon of  
248 *CREBBP* in a child with features of Rubinstein-Taybi syndrome 1 (OMIM#180849) and previous  
249 negative ES. It is important to note that while ES has made strides in detection of structural  
250 variants, copy-neutral variants and single-exon deletions may still not be detected.

#### 251 *Syndromic phenotypes had the highest solve rate*

252 When examining the solve rate separately for each phenotypic category, the largest number of  
253 diagnoses were obtained in individuals with syndromic phenotypes (32 solved cases out of 128  
254 total cases; 25%), while the solve rate in non-syndromic cases was 9.8% (**Figure 5A**). When  
255 further stratifying non-syndromic cases according to the affected organ system (**Figure 5B**),  
256 individuals whose phenotype was categorized as 'Cardiovascular' were the most likely to receive  
257 a diagnosis in our entire cohort (7 out of 19, 36.8 %). All but one of these individuals who received  
258 a diagnosis were affected by dilated cardiomyopathy and were part of a legacy cohort. The genes  
259 we found were not known to be associated with dilated cardiomyopathy at the time of testing,  
260 which explains why they were initially missed.

261

## 262 **Discussion**

263 Our study provides a characterization of the potential of short-read GS, combined with other  
264 confirmatory analyses such as RNAseq, to yield genetic diagnoses for previously undiagnosed  
265 cases. GS provides a molecular diagnostic advantage over ES in that it can detect variants in  
266 regions not interrogated by ES such as introns or non-coding genes, while RNAseq can assist in  
267 establishing the pathogenicity of intronic splice-altering variants by directly demonstrating the  
268 impact on the RNA product. Here, using a combination of GS and RNAseq we discovered cryptic  
269 exon inclusion as a common (among intronic variants) molecular mechanism with a loss-of-  
270 function impact via perturbed splicing.

271 Regarding causative variants in non-protein coding genes, while some examples of disease-  
272 causing non-coding RNAs were previously known, this number is now expanding thanks to the  
273 implementation of GS. Recently discovered examples include the aforementioned *RNU4-2*,  
274 encoding the U4 small nuclear RNA (snRNA) component of the major spliceosome [20, 21], and  
275 the long non-coding RNA *CHASERR*, which was shown to cause a novel syndromic  
276 neurodevelopmental disorder [22].

277 Going forward, we envision that improvements in our ability to evaluate the impact of variants in  
278 regions traditionally missed by conventional genetic testing will continue to increase the diagnostic  
279 yield of GS. It is important to recognize, however, that in some cases it may be cost-effective to  
280 reanalyze ES data instead of resorting to GS, especially given advances in variant interpretation  
281 driven by better predictive models of variant effects and an expanded understanding of tolerated  
282 genetic variation. Indeed, many causal variants in our study could have been detected by a  
283 reanalysis of ES data, using new information provided by variant reclassification or improved  
284 analytic pipelines; a finding that is in alignment with results from previous studies [23-25]. In  
285 addition, testing of other family members can also aid in variant reinterpretation by showing if a  
286 variant is *de novo* or if it segregates with the phenotype in the family. Finally, we speculate that  
287 newer long-read sequencing technologies will help further close the diagnostic gap by capturing  
288 variants not captured by short-read technologies such as certain structural variants and repeat  
289 expansions [26].

290

291

## 292 **Data Availability**

293 Data available in the GREGoR workspace in AnVIL ([AnVIL Portal](#)).

294

## 295 **Funding Statement**

296 The study was supported by the National Institutes of Health grant U01HG011745, as part of the  
297 GREGoR Consortium. KMB was supported by the GREGoR Consortium Research Grant from



298 the GREGoR Data Coordinating Center [U24HG011746]; National Eye Institute [R01EY035717  
299 (KMB) and P30EY014104 (MEEI core support)], Iraty Award 2023 (KMB), Lions Foundation  
300 (KMB) and the Research to Prevent Blindness Unrestricted Grant (KMB).

301

302 Disclosures/Conflict of interest

303 M.H, J.Z. and K.S. are currently employees of Labcorp Genetics Inc, formerly known as Invitae  
304 Corp, I.C. is a former employee of Invitae Corp. All other authors declare no conflicts of interest.

305

306 Acknowledgements

307 We thank the participants and referring physicians for participating in this study.

308

309 Ethics Declaration

310 This study was approved by the Children’s National Hospital Institutional Review Board (IRB)  
311 under protocol Pro00015852. Informed consent was obtained from all participants as required by  
312 the IRB.

313

314

315

316

317

318

319

320

321

322

323

324

325

326 Table 1. Definitions of Phenotypic Categories

|                                        |                                                                                                                                                                                                                                                                                         |
|----------------------------------------|-----------------------------------------------------------------------------------------------------------------------------------------------------------------------------------------------------------------------------------------------------------------------------------------|
| Multisystem Syndromic Disorders        | Proband presenting with symptoms affecting multiple organ systems, often accompanied by distinctive facial features.                                                                                                                                                                    |
| Non-syndromic Disorders                | Proband with conditions that predominantly affect a single organ system, without significant involvement of other systems.                                                                                                                                                              |
| Subcategories                          |                                                                                                                                                                                                                                                                                         |
| Neurodevelopmental Disorders           | Probands exhibiting conditions that primarily affect the development and function of the nervous system, including the brain, spinal cord, and peripheral nerves. This category encompasses disorders impacting cognitive function, behavior, motor skills, and neurological processes. |
| Cardiovascular Disorders               | Proband with primary involvement of the heart and blood vessels, such as structural heart defects, cardiomyopathies, arrhythmias, and vascular diseases.                                                                                                                                |
| Connective Tissue & Skeletal Disorders | Proband with symptoms affecting bones, joints, and connective tissues such as skin, tendons, and ligaments.                                                                                                                                                                             |
| Other                                  | Proband who do not clearly fit any of the aforementioned categories.                                                                                                                                                                                                                    |

327

328

329

330

331

332

333

334

335

336

337 Table 2. Participants with cryptic exon inclusion.

| Participant ID  | Variant                | Gene          | SpliceAI score |       | Distance to variant |           | Pangolin score (Gain) |
|-----------------|------------------------|---------------|----------------|-------|---------------------|-----------|-----------------------|
|                 |                        |               | Acceptor       | Donor | New Acceptor        | New Donor |                       |
| PMGRC-146-146-0 | c.3235+700C>G          | <i>ARID1B</i> | 0.31           | 0.19  | -143 bp             | -5 bp     | 0.54                  |
| PMGRC-220-220-0 | c.1390-515_1390-499del | <i>HADHB</i>  | 0.27           | 0.27  | -85 bp              | 27 bp     | 0.35                  |
| PMGRC-332-332-0 | c.789+973C>G           | <i>CRPPA</i>  | 0.43           | 0.55  | 118 bp              | 5 bp      | 0.46                  |
| PMGRC-403-403-0 | c.1359+601A>G          | <i>PEXI</i>   | 0.30           | 0.54  | 168 bp              | 0 bp      | 0.36                  |
| PMGRC-658-658-0 | c.1282-4218G>A         | <i>DBT</i>    | 0.16           | 0.20  | 161 bp              | 3 bp      | 0.66                  |

338 SpliceAI scores were calculated using the spliceAI lookup tool with a maximum distance of 500 bp.

339

340

341

342

343

344

345

346

347

348

349

350

351

352

353

354

355

356

357

358 Supplemental Table 1. Solved/Probable solved cases

| Participant ID  | Phenotypic Category                           | Gene           | Variant                                                  | Patient Phenotype                                                                                                                                                                                                    | Reason diagnosis was missed on previous testing                        | Associated Disorder (OMIM)                                                               |
|-----------------|-----------------------------------------------|----------------|----------------------------------------------------------|----------------------------------------------------------------------------------------------------------------------------------------------------------------------------------------------------------------------|------------------------------------------------------------------------|------------------------------------------------------------------------------------------|
| PMGRC-13-13-0   | Syndromic                                     | <i>PTHLH</i>   | c.4C>T, p.Gln2*                                          | Pseudohypoparathyroidism, Chiari 1 malformation, shortened metacarpals                                                                                                                                               | Limited Original Testing                                               | Brachydactyly, type E2 (#613382)                                                         |
| PMGRC-32-32-0   | Other                                         | <i>FLG</i>     | c.1297_1298del, p.Asp433fs<br>c.2282_2285del, p.Ser761fs | Eczematoid dermatitis, numerous arcuate plaques with erythematous border, perivascular and interstitial dermatitis with neutrophils on biopsy, ichthyosiform xerosis                                                 | Limited Original Testing                                               | Ichthyosis vulgaris (#146700)                                                            |
| PMGRC-43-43-0   | Syndromic                                     | <i>HECTD1</i>  | c.2082C>G, p.Phe694Leu                                   | Hypotonia, oral dysphagia, macrocephaly, autism spectrum disorder, somatic overgrowth syndrome, hypothalamic obesity, tube feeding, esotropia, stereotypic movements, abnormal brain MRI, dysmorphic facial features | New Information/Reclassification/Candidate gene now linked to syndrome | HECTD1-neurodevelopmental disorder (under review)                                        |
| PMGRC-46-46-0   | Syndromic                                     | <i>PPP1R3F</i> | c.554_555del, p.His185fs*66                              | Hypotonia, tube feeding, autism spectrum disorder, speech/language delays, developmental delay                                                                                                                       | New Information/Reclassification/Candidate gene now linked to syndrome | X-linked PPP1R3F neurodevelopmental disorder [27]                                        |
| PMGRC-88-88-0   | Syndromic                                     | <i>NARS2</i>   | c.749G>A, p.Arg250Gln                                    | Critically ill neonate with multisystemic disease. A few months later, new findings of interstitial lung disease and refractory seizures                                                                             | Limited Original Testing                                               | Combined oxidative phosphorylation deficiency 24 (#616239)                               |
| PMGRC-101-101-0 | Syndromic                                     | <i>CBL</i>     | c.1259G>A, p.Arg420Gln                                   | Hemihypertrophy, nystagmus, club foot                                                                                                                                                                                | Previously known                                                       | Noonan syndrome-like disorder with or without juvenile myelomonocytic leukemia (#613563) |
| PMGRC-114-114-0 | Connective tissue & Musculoskeletal disorders | <i>ACAN</i>    | c.4753del, p.Asp1585fs<br>c.757+4A>G                     | Severe scoliosis, spondyloepimetaphyseal dysplasia, genu valgum, short stature                                                                                                                                       | Previously known                                                       | Spondyloepimetaphyseal dysplasia, aggrecan type (#612813)                                |

|                 |                    |               |                                               |                                                                                                                                                            |                                  |                                                                                       |
|-----------------|--------------------|---------------|-----------------------------------------------|------------------------------------------------------------------------------------------------------------------------------------------------------------|----------------------------------|---------------------------------------------------------------------------------------|
| PMGRC-124-124-0 | Syndromic          | <i>HFE</i>    | c.187C>G, p.His63Asp<br>c.892G>A, p.Glu298Lys | Liver disease, hyperammonemia, encephalopathy, hyperbilirubinemia                                                                                          | Limited Original Testing         | Hemochromatosis, type 1 (#235200)                                                     |
| PMGRC-146-146-0 | Syndromic          | <i>ARID1B</i> | c.3235+700C>G                                 | Developmental delay, gross motor delay, abnormal brain MRI, mixed receptive-expressive language disorder, dysmorphic facial features                       | Limited Original Testing         | Coffin-Siris syndrome 1 (#135900)                                                     |
| PMGRC-148-148-0 | Syndromic          | <i>RNU4-2</i> | n.64_65insT                                   | Hypotonia, global developmental delay, speech delay, febrile seizures, optic nerve hypoplasia, tube feeding, dysmorphic facial features                    | Limited Original Testing         | ReNU syndrome (#620851)                                                               |
| PMGRC-151-151-0 | Syndromic          | <i>GLMN</i>   | c.157_161del,<br>p.Glu52_Lys53insTer          | Clinical diagnosis of glomuvenous malformations                                                                                                            | Limited Original Testing         | Glomuvenous malformations (#138000)                                                   |
| PMGRC-158-158-0 | Syndromic          | <i>COQ2</i>   | c.421G>C, p.Val141Leu<br>c.138dup, p.Ala47fs  | Retinal atrophy, horseshoe kidney, nephrotic syndrome                                                                                                      | New Information/Reclassification | Coenzyme Q10 deficiency, primary, 1 (#607426)                                         |
| PMGRC-170-170-0 | Neurodevelopmental | <i>GRIA4</i>  | c.1643G>C, p.Trp548Ser                        | Hypotonia, feeding difficulties, global developmental delays of motor and language skills, microcephaly, delayed visual attention, abnormal brain MRI      | New Information/Reclassification | Neurodevelopmental disorder with or without seizures and gait abnormalities (#617864) |
| PMGRC-175-175-0 | Syndromic          | <i>PTPN11</i> | c.1510A>G, p.Met504Val                        | Pulmonary valve stenosis, toe syndactyly, widely spaced nipples                                                                                            | Previously Known                 | Noonan syndrome 1 (#163950)                                                           |
| PMGRC-176-176-0 | Syndromic          | <i>SCN8A</i>  | c.2549G>A, p.Arg850Gln                        | Refractory seizures, epileptic encephalopathy, infantile spasms, global developmental delay, hypotonia, tube feeding, respiratory insufficiency, hypotonia | Previously Known                 | Developmental and epileptic encephalopathy 13 (#614558)                               |
| PMGRC-178-178-0 | Neurodevelopmental | <i>CHD1</i>   | c.1010C>T, p.Thr337Ile                        | Motor delay, hypotonia, stereotypic behaviors, autism spectrum disorder                                                                                    | New Information/Reclassification | Pilarowski-Bjornsson syndrome (#617682)                                               |

|                 |                    |               |                                                                                   |                                                                                                                                                            |                                  |                                                                                                                     |
|-----------------|--------------------|---------------|-----------------------------------------------------------------------------------|------------------------------------------------------------------------------------------------------------------------------------------------------------|----------------------------------|---------------------------------------------------------------------------------------------------------------------|
| PMGRC-204-204-0 | Neurodevelopmental | <i>FBXO31</i> | c.1000G>A, p.Asp334Asn                                                            | Abnormal brain MRI, gross motor delay, speech delay, hypertonia, lower extremity spasticity, esotropia, mixed receptive-expressive language disorder       | New Information/Reclassification | FBXO31-related spastic-dystonic cerebral palsy syndrome [28]                                                        |
| PMGRC-205-205-0 | Syndromic          | <i>SLC6A8</i> | c.1255-3_1255-2delCA                                                              | Acute liver failure, acute kidney injury, autism spectrum disorder                                                                                         | Limited Original Testing         | Cerebral creatine deficiency syndrome 1 (#300352)                                                                   |
| PMGRC-212-212-0 | Other              | <i>OCA2</i>   | c.1465A>G, p.Asn489Asp and a complex rearrangement with deep intronic breakpoints | Oculocutaneous albinism                                                                                                                                    | Limited Original Testing         | Oculocutaneous albinism, type II (#203200)                                                                          |
| PMGRC-220-220-0 | Syndromic          | <i>HADHB</i>  | c.1390-515_1390-499del                                                            | Hypoparathyroidism, LCHAD, mitochondrial trifunctional protein deficiency, pancytopenia, bone marrow deficiency, nephrotic syndrome, tube feeding          | Limited Original Testing         | Mitochondrial trifunctional protein deficiency 2 (#620300) [29]                                                     |
| PMGRC-265-265-0 | Syndromic          | <i>RNF220</i> | c.1094G>A, p.Arg365Gln                                                            | Bilateral sensorineural hearing loss, leukodystrophy, seizures, mixed receptive-expressive language disorder, photoreceptor degeneration, intention tremor | New Info/Reclassification        | Leukodystrophy, hypomyelinating, 23, with ataxia, deafness, liver dysfunction, and dilated cardiomyopathy (#619688) |
| PMGRC-316-316-0 | Syndromic          | <i>PTPN11</i> | c.794G>A, p.Arg265Gln                                                             | Short stature, gross motor delays                                                                                                                          | Limited Original Testing         | Noonan syndrome 1 (#163950)                                                                                         |
| PMGRC-332-332-0 | Neurodevelopmental | <i>CRPPA</i>  | c.789+973C>G                                                                      | Global developmental delay, hypotonia, chronic lung disease, retinopathy, severe optic atrophy, tube feeding, abnormal brain MRI                           | Limited Original Testing         | Muscular dystrophy-dystroglycanopathy (congenital with brain and eye anomalies), type A, 7 (#614643)                |
| PMGRC-355-355-0 | Neurodevelopmental | <i>TCF7L2</i> | c.1156C>T, p.Arg240Cys                                                            | Walking difficulties, unsteady gait, lateral lisps, ADHD, distal weakness, hammertoes, gynecomastia, learning disabilities                                 | New Information/Reclassification | TCF7L2-associated syndromic neurodevelopmental disorder [30]                                                        |

|                 |                    |               |                                     |                                                                                                                                                                                                                 |                                           |                                                   |
|-----------------|--------------------|---------------|-------------------------------------|-----------------------------------------------------------------------------------------------------------------------------------------------------------------------------------------------------------------|-------------------------------------------|---------------------------------------------------|
| PMGRC-366-366-0 | Neurodevelopmental | <i>DDX17</i>  | c.1077G>A, p.Trp359*                | Hypotonia, global developmental delay, gross motor delay, mixed receptive-expressive language disorder, foot drop, steppage gait, pes planus, ataxic gait                                                       | New Information/Reclassification          | DDX17-associated neurodevelopmental disorder [31] |
| PMGRC-388-388-0 | Syndromic          | <i>RNU4-2</i> | n.64_65insT                         | Global developmental delay, hemiparesis, microcephaly, tube feeding, growth delays, truncal hypotonia, autism spectrum disorder, nonverbal, speech apraxia, sensory processing difficulties, abnormal brain MRI | Limited Original Testing                  | ReNU syndrome (#620851)                           |
| PMGRC-392-392-0 | Neurodevelopmental | <i>COQ4</i>   | c.718C>T, p.Arg240Cys<br>c.202+4A>C | Spastic diplegia, gross motor delays, speech articulation delay, unsteady gait, walking difficulties                                                                                                            | New Information/Reclassification          | Spastic ataxia 10, (#620666)                      |
| PMGRC-403-403-0 | Syndromic          | <i>PEX1</i>   | c.1359+601A>G                       | Zellweger Spectrum Disorder, elevated very long-chain fatty acids, decreased plasmalogen                                                                                                                        | Limited Original Testing                  | Peroxisome biogenesis disorder 1A (#214100)       |
| PMGRC-418-418-0 | Neurodevelopmental | <i>ZIC2</i>   | c.1030_1032del, p.Trp359*           | Alobar holoprosencephaly                                                                                                                                                                                        | Limited Original Testing                  | Holoprosencephaly 5 (#609637)                     |
| PMGRC-437-437-0 | Syndromic          | <i>GLI2</i>   | c.1111_1120del, p.Ile371fs          | Septopreoptic holoprosencephaly, solitary median maxillary incisor syndrome, low thyroid, underdeveloped pituitary, sensory processing disorder, failure to thrive                                              | Limited Original Testing                  | Holoprosencephaly 9 (#610829)                     |
| PMGRC-440-440-0 | Syndromic          | <i>ZIC2</i>   | c.1013del, p.Pro338fs               | Deafness, cerebral palsy, holoprosencephaly                                                                                                                                                                     | Previous testing information not provided | Holoprosencephaly 5 (#609637)                     |
| PMGRC-451-451-0 | Syndromic          | <i>ZIC2</i>   | c.1377_1406dup, p.Ala461_Ala470dup  | Semilobar holoprosencephaly, diabetes insipidus, delayed development                                                                                                                                            | Limited Original Testing                  | Holoprosencephaly 5 (#609637)                     |
| PMGRC-509-509-0 | Syndromic          | <i>RNU4-2</i> | n.64_65insT                         | Microcephaly, hypotonia, delayed myelination, gross motor delay, brachycephaly, abnormal brain MRI, global developmental delay                                                                                  | Limited Original Testing                  | ReNU syndrome (#620851)                           |
| PMGRC-538-538-0 | Syndromic          | <i>AGO2</i>   | c.602G>T, p.Gly201Val               | Hip dysplasia, congenital hypotonia, cleft palate, global developmental delay, hearing loss, Pierre Robin sequence, seizures, speech delay, cerebral palsy,                                                     | New Information/Reclassification          | Lessel-Kreienkamp syndrome (#619149)              |



|                 |                    |               |                                                                   |                                                                                                                                                                                                         |                                  |                                                                                                         |
|-----------------|--------------------|---------------|-------------------------------------------------------------------|---------------------------------------------------------------------------------------------------------------------------------------------------------------------------------------------------------|----------------------------------|---------------------------------------------------------------------------------------------------------|
|                 |                    |               |                                                                   | scoliosis, congenital heart defects, dysmorphic facial features                                                                                                                                         |                                  |                                                                                                         |
| PMGRC-540-540-0 | Syndromic          | <i>KMT2C</i>  | c.5668C>T, p.Arg1890*                                             | Hypotonia, fine motor delay, gross motor delay, sensory processing disorder, speech delay, decreased oral tone, selective mutism, ADHD, developmental coordination disorder, dysmorphic facial features | Limited Original Testing         | Kleefstra syndrome 2 (#617768)                                                                          |
| PMGRC-569-569-0 | Neurodevelopmental | <i>STAG2</i>  | 87kb deletion of chrX:123,946,386-124,003590<br>Exon 1-4 deletion | Holoprosencephaly, global developmental delay, scoliosis, apraxia of speech, vision problems, vertebral anomaly                                                                                         | Previously Known                 | Holoprosencephaly -13, X-linked (#301043)                                                               |
| PMGRC-599-599-0 | Neurodevelopmental | <i>RNU4-2</i> | n.69C>T                                                           | Small for gestational age, abnormal visual development/eye movement irregularity, global developmental delay, hypotonia, abnormal brain MRI                                                             | Limited Original Testing         | ReNU syndrome (#620851)                                                                                 |
| PMGRC-635-635-0 | Syndromic          | <i>CDK13</i>  | c.425dup, p.Leu143fs                                              | Congenital heart disease, dysmorphic facial features, short stature, ADHD, global developmental delay                                                                                                   | New Information/Reclassification | Congenital heart defects, dysmorphic facial features, and intellectual developmental disorder (#617360) |
| PMGRC-658-658-0 | Syndromic          | <i>DBT</i>    | c.1282-4218G>A                                                    | Prenatal diagnosis of Argininosuccinic acid lyase deficiency and thiamine-responsive maple syrup urine disease                                                                                          | Limited Original Testing         | Argininosuccinic aciduria, Maple syrup urine disease, type II (#620699)                                 |
| PMGRC-677-677-0 | Syndromic          | <i>TPM3</i>   | c.835C>G, p.Leu279Val                                             | Pierre Robin sequence, tube feeding, gastroparesis, mannose-binding lectin deficiency, recurrent aspiration pneumonia and sinusitis, abnormal brain MRI, hypotonia                                      | Limited Original Testing         | Congenital Myopathy 4A, Autosomal Dominant (#255310)                                                    |
| PMGRC-700-700-0 | Syndromic          | <i>OFD1</i>   | c.2413dup, p.Gln805fs                                             | Semilobar holoprosencephaly, cleft lip and palate, bilateral postaxial polydactyly of hands and feet, bilateral cryptorchidism, Dandy-Walker malformation, ventriculomegaly, hypotelorism, seizures     | Limited Original Testing         | Joubert syndrome 10 (#300804)                                                                           |

|                 |                |               |                                       |                                                                                                                                                                                           |                                  |                                                                             |
|-----------------|----------------|---------------|---------------------------------------|-------------------------------------------------------------------------------------------------------------------------------------------------------------------------------------------|----------------------------------|-----------------------------------------------------------------------------|
| PMGRC-753-753-0 | Syndromic      | <i>MSL2</i>   | c.535G>T, p.Glu179*                   | Gross motor delay, speech delay, hypotonia, microcephaly, frontal bossing, fine hair, ptosis, pectus excavatum, low muscle tone, Mongolian spot in lower back, global developmental delay | New Information/Reclassification | Karayol-Borroto-Haghshenas neurodevelopmental syndrome (#620985)            |
| PMGRC-812-812-0 | Syndromic      | <i>NDST1</i>  | c.1850 C>T, p.Thr617Ile               | Ankyloglossia, gross motor delays, thoracolumbar kyphosis, global developmental delay, axial hypotonia                                                                                    | New Information/Reclassification | Intellectual Developmental Disorder, Autosomal Recessive 46 (#616116)       |
| PMGRC-817-817-0 | Syndromic      | <i>MT-TL1</i> | n.14A>G (m.3243A>G)                   | Fatigue, headache, recurrent fever, tinnitus, recurrent episodes of infection, sudden loss of hearing                                                                                     | Limited Original Testing         | Diabetes-deafness syndrome (#520000)                                        |
| PMGRC-890-890-0 | Cardiovascular | <i>TNN</i>    | c.59604_59607delAAAAG<br>p.Gly19871fs | Dilated Cardiomyopathy                                                                                                                                                                    | Limited Original Testing         | Dilated Cardiomyopathy, 1G (#604145)                                        |
| PMGRC-897-897-0 | Cardiovascular | <i>SCN5A</i>  | c.3911C>T, p.Thr1304Met               | Dilated Cardiomyopathy                                                                                                                                                                    | Previously Known                 | Dilated Cardiomyopathy, 1E (#601154)                                        |
| PMGRC-904-904-0 | Cardiovascular | <i>DMD</i>    | c.9851G>A, p.Trp3284*                 | Dilated Cardiomyopathy                                                                                                                                                                    | Previously Known                 | Dilated Cardiomyopathy, 3B (#302045)                                        |
| PMGRC-911-911-0 | Cardiovascular | <i>MYH6</i>   | c.2489C>T, p.Pro830Leu                | Dilated Cardiomyopathy                                                                                                                                                                    | Limited Original Testing         | Dilated Cardiomyopathy, 1EE (#613252)                                       |
| PMGRC-914-914-0 | Cardiovascular | <i>TNNT2</i>  | c.517C>T, p.Arg173Trp                 | Dilated Cardiomyopathy                                                                                                                                                                    | Limited Original Testing         | Dilated Cardiomyopathy, 1D (#601494)                                        |
| PMGRC-917-917-0 | Cardiovascular | <i>RBM20</i>  | c.2497dupA, p.Arg833fs                | Dilated Cardiomyopathy                                                                                                                                                                    | Limited Original Testing         | Dilated Cardiomyopathy, 1DD (#613172)                                       |
| PMGRC-921-921-0 | Cardiovascular | <i>TNNI3K</i> | c.2302G>A, p.Glu768Lys                | Dilated Cardiomyopathy                                                                                                                                                                    | Limited Original Testing         | Cardiac conduction disease with or without dilated cardiomyopathy (#616117) |

|                   |                                               |               |                         |                                                                                                                           |                                           |                                       |
|-------------------|-----------------------------------------------|---------------|-------------------------|---------------------------------------------------------------------------------------------------------------------------|-------------------------------------------|---------------------------------------|
| PMGRC-991-991-0   | Connective tissue & Musculoskeletal disorders | <i>TGFBR1</i> | c.1355del, p.Pro452fs   | Thoracic aortic aneurysm, Aortic dissection                                                                               | Previous testing information not provided | Loeys-Dietz syndrome 1 (#609192)      |
| PMGRC-1040-1040-0 | Connective tissue & Musculoskeletal disorders | <i>FBNI</i>   | c.4096G>A, p.Glu1366Lys | Thoracic aortic aneurysm, Aortic dissection                                                                               | Previous testing information not provided | Marfan syndrome (#154700)             |
| PMGRC-1091-1091-0 | Syndromic                                     | <i>CREBBP</i> | exon 2 deletion         | Failure to thrive, global developmental delay, pectus excavatum, axial hypotonia, abnormal brain MRI, dysmorphic features | Limited Original Testing                  | Rubinstein-Taybi syndrome 1 (#180849) |

359 *ADHD* attention deficit hyperactivity disorder, *LCHAD* long-chain 3-hydroxyacyl-CoA dehydrogenase enzyme deficiency, *MRI*  
 360 magnetic resonance imaging

361

362

363

364

365

366

367

368

369

370

371

372

373

374

375

376

377

378 Supplemental Table 2. Candidate genes identified in unsolved cases. All genes are deposited in  
379 GeneMatcher.

| Participant ID  | Candidate Gene                | Variant                                                                                                |
|-----------------|-------------------------------|--------------------------------------------------------------------------------------------------------|
| PMGRC-86-86-0   | <i>NRXN2</i>                  | c.2107G>A, p.Gly703Ser                                                                                 |
| PMGRC-104-104-0 | <i>GALNT16</i>                | c.502+1G>A                                                                                             |
| PMGRC-116-116-0 | <i>ARHGAP21; PDPK1</i>        | c.3692_3693del;<br>c.1588G>A, p.Gly530Arg                                                              |
| PMGRC-137-137-0 | <i>CSMD3</i>                  | c.3158dup, p.Arg1530*                                                                                  |
| PMGRC-217-217-0 | <i>SLC16A13; HIVEP1; MHY7</i> | c.410G>A, p.Arg137Gln,<br>c.395A>G, p.Tyr132Cys;<br>c.6212dupA, p.Tyr2071*;<br>c.4187G>T, p.Arg1396Leu |
| PMGRC-239-239-0 | <i>FGD5</i>                   | c.3372_3373del,<br>p.Gly1125Glufs*54                                                                   |
| PMGRC-255-255-0 | <i>NRXN2; STRN3</i>           | c.2605C>T, p.Arg869Trp;<br>c.1875C>A, p.Tyr625*                                                        |
| PMGRC-279-279-0 | <i>VWA3B</i>                  | c.59G>T, p.Gly20Val<br>c.1737+1G>A                                                                     |
| PMGRC-291-291-0 | <i>NSL1</i>                   | c.314-2_315delAGAT                                                                                     |
| PMGRC-312-312-0 | <i>TJPI</i>                   | c.3927-2_3927-1del                                                                                     |
| PMGRC-363-363-0 | <i>CEP350</i>                 | c.2258del, p.Gly753Glufs*11                                                                            |
| PMGRC-423-423-0 | <i>FAM193A; MEX3D; CLPTM1</i> | c.1390-2A>G;<br>c.595+1G>C;<br>c.953A>G, p.Tyr318Cys                                                   |
| PMGRC-446-446-0 | <i>TP53BP2</i>                | c.40G>A, p.Val14Met<br>c.3240del, p.Asp1080Glufs*5                                                     |
| PMGRC-485-485-0 | <i>HEATR1; PRR30</i>          | c.3613C>T, p.Gln1205*;<br>c.275del, p.Pro92Glnfs*33, c.-<br>365-6C>T                                   |
| PMGRC-525-525-0 | <i>PLXNC1</i>                 | c.416del, p.Leu139Argfs*4                                                                              |
| PMGRC-746-746-0 | <i>DOPIA; PCDH9</i>           | c.3559dup, p.Ile1187Asnfs*5;<br>c.3291del, p.Ser1098Leufs*25                                           |

It is made available under a [CC-BY 4.0 International license](https://creativecommons.org/licenses/by/4.0/) .

|                   |                  |                                                                              |
|-------------------|------------------|------------------------------------------------------------------------------|
| PMGRC-772-772-0   | <i>MUC5B</i>     | c.15477+1G>C                                                                 |
| PMGRC-782-782-0   | <i>CD177</i>     | c.99G>A, p.Trp33*                                                            |
| PMGRC-832-832-0   | <i>TLN2; IL9</i> | c.4645C>T, p.Asp1549Tyr;<br>c.183+6T>C, p.Ser893Arg,<br>c.202T>C, p.Cys68Arg |
| PMGRC-949-949-0   | <i>GNRH2</i>     | c.213_214insTGTC                                                             |
| PMGRC-985-985-0   | <i>FMNL1</i>     | c.1379del, p.Pro460Glnfs*19                                                  |
| PMGRC-992-992-0   | <i>PRR14L</i>    | c.4166del, p.Tyr318Cys                                                       |
| PMGRC-999-999-0   | <i>SLC17A9</i>   | c.287C>G, p.Tyr132Cys                                                        |
| PMGRC-1017-1017-0 | <i>NXF3</i>      | c.1231G>T, p.Glu411*                                                         |
| PMGRC-1030-1030-0 | <i>CORO1C</i>    | c.474G>A, p.Trp158*                                                          |
| PMGRC-1048-1048-0 | <i>NEURL4</i>    | c.1606G>T, p.Glu536*                                                         |
| PMGRC-1050-1050-0 | <i>CUL1</i>      | c.571_575del, p.Arg191Trpfs*2                                                |

380

381

382

383

384

385

386

387

388

389

390

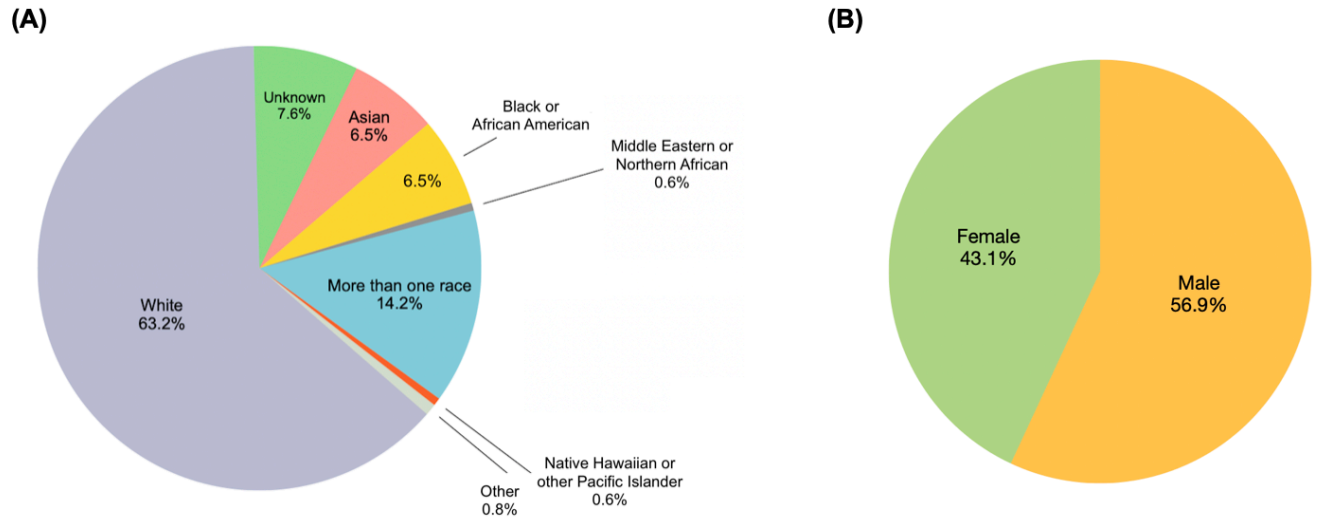

391

392 **Figure 1. (A), (B)** Sex and race distribution of probands that underwent genome sequencing.

393

394

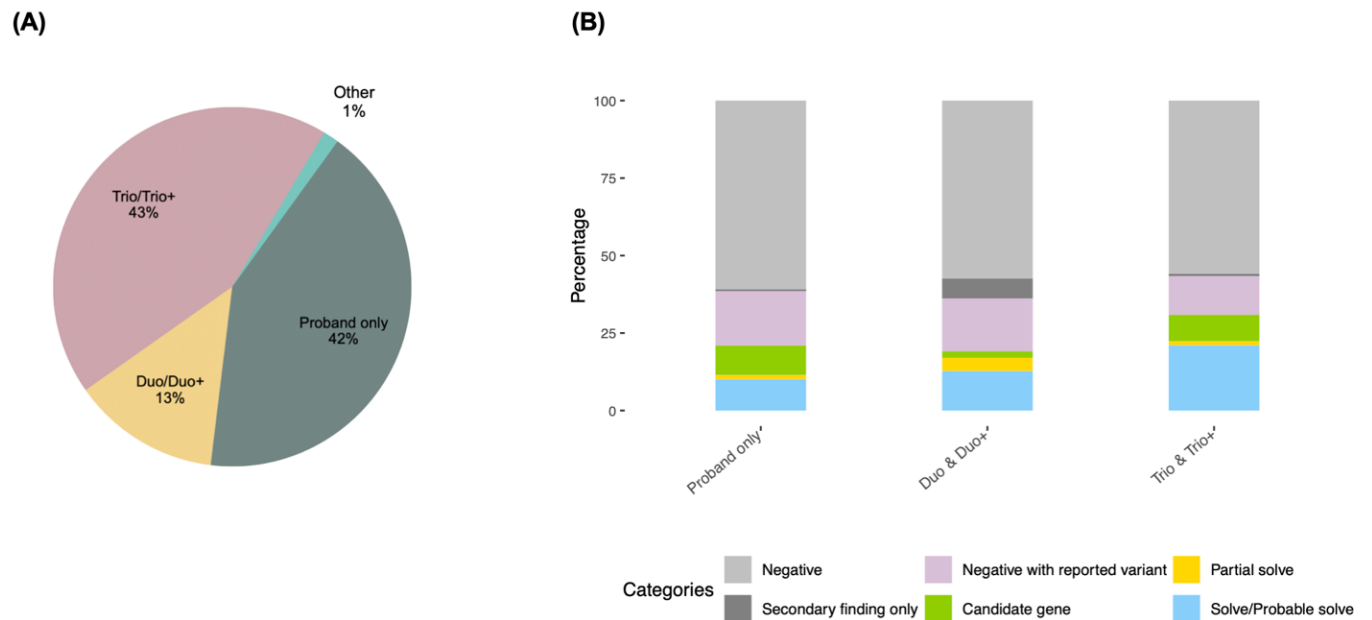

395

396 **Figure 2. (A)** Family structures corresponding to the participants **(B)**. Trio/Trio+ had the highest  
397 diagnostic yield (21%) whereas Duo/Duo+ and Proband only families reached a diagnostic yield of 13%  
398 and 10% respectively ( $p = 0.03$ , chi-square test).

399

400

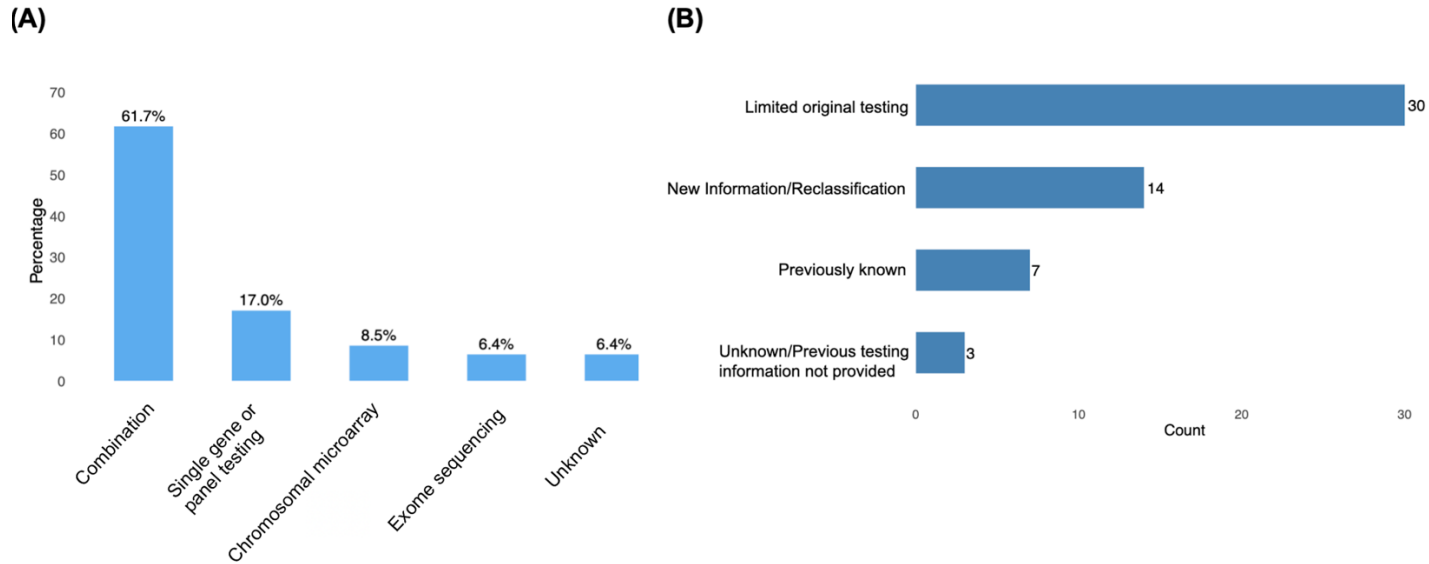

401

402 **Figure 3. (A)** Types of prior testing undergone by participants that were deemed solved or probably  
 403 solved. **(B)** Reasons diagnosis was previously missed on clinical genetic testing. Limited original testing  
 404 includes gene panels that lacked the causative gene or did not detect the causative variant due to its  
 405 location in a genomic region not covered by the test.

406

407

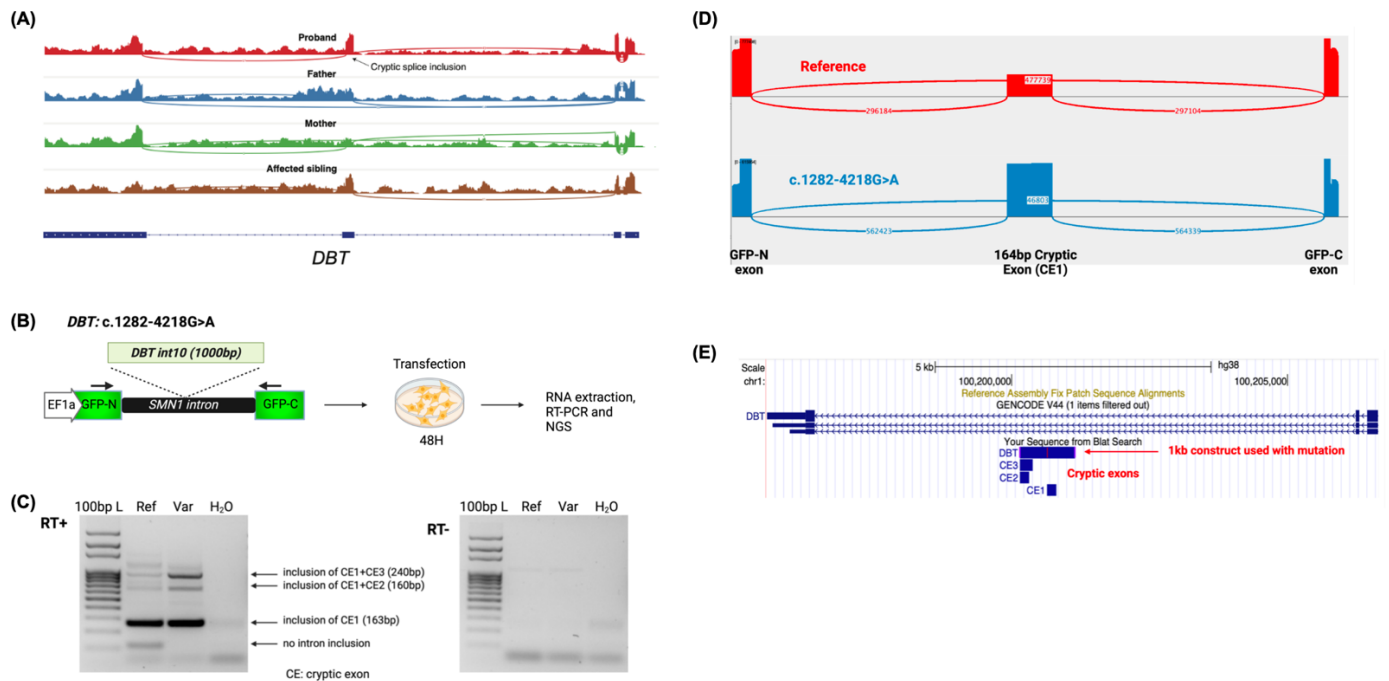

408

409 **Figure 4. (A)** RNA sequencing reads visualized with sashimi plot to indicate splicing events showing the  
 410 cryptic splice inclusion in *DBT* in the proband (PMGRC-658-658-0) and the affected sibling as a result of

411 a deep (-4230) homozygous intronic single nucleotide variant. **(B-E) Mini-gene splicing assay for the**  
412 ***DBT* c.1282-4218G>A variant. B)** Reference and c.1282-4218G>A variant *DBT* intron 10 fragments  
413 were cloned into a mini-gene split *GFP* construct, in which N and C-terminal parts of the *GFP* gene were  
414 separated by *SMN1* introns 7 and 8 (NM\_000344). The construct was expressed in HEK293 cells for 48  
415 hours followed by mRNA extraction, cDNA generation and NGS amplicon sequencing. Black arrows on  
416 the construct image indicate primer placement. **C)** RT-PCR gel electrophoresis demonstrates inclusion of  
417 the cryptic exon in both the wild type and reference transcript. **D)** Sashimi plots of reference and variant  
418 hybrid *DBT*-*GFP* constructs demonstrating a preferential cryptic exon (10B) inclusion in the sequences  
419 containing the c.1282-4218G>A variant. **E)** Inclusion of cryptic exon 10B leads to a premature stop  
420 codon at the end of the exon, which most likely escapes nonsense-mediated decay and leads to a truncated  
421 protein with a C-terminus different by 16-residues.

422

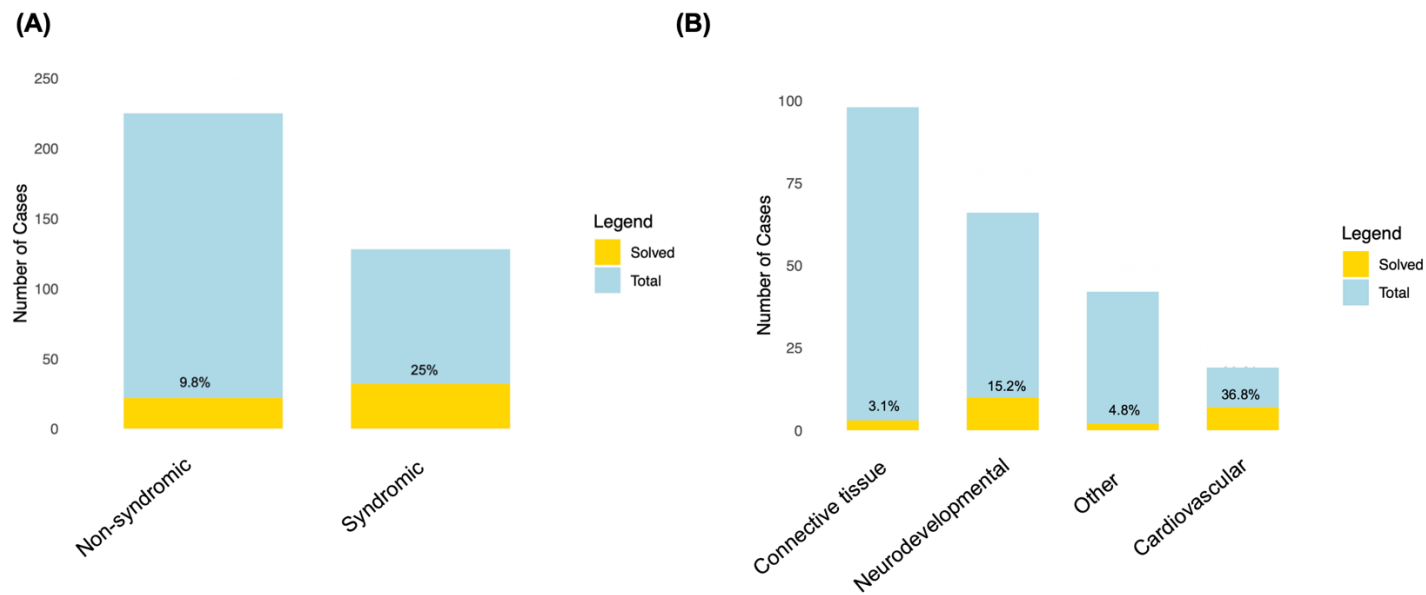

423

424 **Figure 5.** (A) The solve rate for syndromic versus non-syndromic cases. (B) The solve rate stratified by  
425 phenotypic category for the non-syndromic cases.

426

427

428

429

430

431

432

433

434



435  
436  
437  
438  
439  
440  
441

References

- 442 1. Slavotinek, A., et al., *Diagnostic yield of pediatric and prenatal exome sequencing in a diverse*  
443 *population*. NPJ Genom Med, 2023. **8**(1): p. 10.
- 444 2. Wilke, M., et al., *Diagnostic yield of exome and genome sequencing after non-diagnostic multi-*  
445 *gene panels in patients with single-system diseases*. Orphanet J Rare Dis, 2024. **19**(1): p. 216.
- 446 3. Jaganathan, K., et al., *Predicting Splicing from Primary Sequence with Deep Learning*. Cell, 2019.  
447 **176**(3): p. 535-548 e24.
- 448 4. Zeng, T. and Y.I. Li, *Predicting RNA splicing from DNA sequence using Pangolin*. Genome Biol,  
449 2022. **23**(1): p. 103.
- 450 5. Savage, S.K., et al., *Using a chat-based informed consent tool in large-scale genomic research*. J  
451 Am Med Inform Assoc, 2024. **31**(2): p. 472-478.
- 452 6. Berger, S.I., et al., *Increased diagnostic yield from negative whole genome-slice panels using*  
453 *automated reanalysis*. Clin Genet, 2023. **104**(3): p. 377-383.
- 454 7. Li, H., *Aligning sequence reads, clone sequences and assembly contigs with BWA-MEM*. 2013:  
455 arXiv.
- 456 8. Poplin, R., et al., *A universal SNP and small-indel variant caller using deep neural networks*. Nat  
457 Biotechnol, 2018. **36**(10): p. 983-987.
- 458 9. Chen, X., et al., *Manta: rapid detection of structural variants and indels for germline and cancer*  
459 *sequencing applications*. Bioinformatics, 2016. **32**(8): p. 1220-2.
- 460 10. Dobin, A., et al., *STAR: ultrafast universal RNA-seq aligner*. Bioinformatics, 2013. **29**(1): p. 15-21.
- 461 11. Robinson, J.T., et al., *igv.js: an embeddable JavaScript implementation of the Integrative*  
462 *Genomics Viewer (IGV)*. Bioinformatics, 2023. **39**(1).
- 463 12. Robinson, J.T., et al., *Variant Review with the Integrative Genomics Viewer*. Cancer Res, 2017.  
464 **77**(21): p. e31-e34.
- 465 13. Robinson, J.T., et al., *Integrative genomics viewer*. Nat Biotechnol, 2011. **29**(1): p. 24-6.
- 466 14. Thorvaldsdottir, H., J.T. Robinson, and J.P. Mesirov, *Integrative Genomics Viewer (IGV): high-*  
467 *performance genomics data visualization and exploration*. Brief Bioinform, 2013. **14**(2): p. 178-  
468 92.
- 469 15. Scott, H.A., et al., *A high throughput splicing assay to investigate the effect of variants of*  
470 *unknown significance on exon inclusion*. medRxiv, 2023: p. 2022.11.30.22282952.
- 471 16. Dobin, A. and T.R. Gingeras, *Optimizing RNA-Seq Mapping with STAR*. Methods Mol Biol, 2016.  
472 **1415**: p. 245-62.
- 473 17. Clark, M.M., et al., *Diagnosis of genetic diseases in seriously ill children by rapid whole-genome*  
474 *sequencing and automated phenotyping and interpretation*. Sci Transl Med, 2019. **11**(489).
- 475 18. O'Brien, T.D., et al., *Artificial intelligence (AI)-assisted exome reanalysis greatly aids in the*  
476 *identification of new positive cases and reduces analysis time in a clinical diagnostic laboratory*.  
477 Genet Med, 2022. **24**(1): p. 192-200.

- 478 19. Negi, S., et al., *Advancing long-read nanopore genome assembly and accurate variant calling for*  
479 *rare disease detection*. medRxiv, 2024.
- 480 20. Chen, Y., et al., *De novo variants in the RNU4-2 snRNA cause a frequent neurodevelopmental*  
481 *syndrome*. Nature, 2024. **632**(8026): p. 832-840.
- 482 21. Nguyen, T.H., et al., *The architecture of the spliceosomal U4/U6.U5 tri-snRNP*. Nature, 2015.  
483 **523**(7558): p. 47-52.
- 484 22. Ganesh, V.S., et al., *Novel syndromic neurodevelopmental disorder caused by de novo deletion of*  
485 *CHASERR, a long noncoding RNA*. medRxiv, 2024.
- 486 23. Wojcik, M.H., et al., *Genome Sequencing for Diagnosing Rare Diseases*. N Engl J Med, 2024.  
487 **390**(21): p. 1985-1997.
- 488 24. Palmer, E.E., et al., *Diagnostic Yield of Whole Genome Sequencing After Nondiagnostic Exome*  
489 *Sequencing or Gene Panel in Developmental and Epileptic Encephalopathies*. Neurology, 2021.  
490 **96**(13): p. e1770-e1782.
- 491 25. Alfares, A., et al., *Whole-genome sequencing offers additional but limited clinical utility*  
492 *compared with reanalysis of whole-exome sequencing*. Genet Med, 2018. **20**(11): p. 1328-1333.
- 493 26. Wojcik, M.H., et al., *Beyond the exome: What's next in diagnostic testing for Mendelian*  
494 *conditions*. Am J Hum Genet, 2023. **110**(8): p. 1229-1248.
- 495 27. Liu, Z., et al., *Hemizygous variants in protein phosphatase 1 regulatory subunit 3F (PPP1R3F) are*  
496 *associated with a neurodevelopmental disorder characterized by developmental delay,*  
497 *intellectual disability and autistic features*. Hum Mol Genet, 2023. **32**(20): p. 2981-2995.
- 498 28. Dzinovic, I., et al., *Variant recurrence confirms the existence of a FBXO31-related spastic-dystonic*  
499 *cerebral palsy syndrome*. Ann Clin Transl Neurol, 2021. **8**(4): p. 951-955.
- 500 29. Thomas Cassini, S.S., Molly Behan, Cynthia J. Tift, May Christine Malicdan, David R. Adams,  
501 Undiagnosed Diseases Network, Sun-Young Ahn, Debra S. Regier, *Mitochondrial trifunctional*  
502 *protein deficiency caused by a deep intronic deletion leading to aberrant splicing*. JIMD Reports,  
503 2024. **66**(1).
- 504 30. Dias, C., et al., *De novo variants in TCF7L2 are associated with a syndromic neurodevelopmental*  
505 *disorder*. Am J Med Genet A, 2021. **185**(8): p. 2384-2390.
- 506 31. Seaby, E.G., et al., *Monoallelic de novo variants in DDX17 cause a neurodevelopmental disorder*.  
507 Brain, 2024.

508

509
